# Supplementary material for: Delayed postglacial colonization of Betula in Iceland and the circum North Atlantic
Source: eLife. 2023 Nov 13;12:RP87749. doi: 10.7554/eLife.87749 (PMC10642962; doi:10.7554/eLife.87749)
Supplement: Figure 2—source data 1. [file elife-87749-fig2-data1.xlsx]

## Sheet: tephra
Depth (cm)	Thickness (cm)	Tephra ID	Age BP	n	SiO2	TiO2	Al2O3	FeO	MnO	MgO	CaO	Na2O	K2O	P2O5	Total
342.2	0.8	Hekla 4	4200	18	73.84	0.11	13.21	1.94	0.07	0.03	1.34	4.56	2.76	0.02	97.88
				SD	0.79	0.03	0.2	0.1	0.04	0.05	0.08	0.16	0.08	0.02	0.93
				7	58.58	1.25	14.65	9.52	0.25	1.8	5.17	4.17	1.45	0.57	97.42
				SD	1.21	0.17	0.26	0.38	0.04	0.37	0.29	0.19	0.09	0.12	0.59
				8	46.19	3.8	13.45	14.24	0.22	5.51	10.24	2.96	0.58	0.47	97.65
				SD	0.3	0.47	0.75	0.38	0.05	0.44	0.44	0.11	0.1	0.26	0.4
414	0.5	Kverkfjöll	5200	8	49.98	3.1	12.98	14.71	0.23	4.43	9.02	3.02	0.67	0.39	98.52
				SD	0.41	0.07	0.17	0.23	0.03	0.22	0.18	0.06	0.04	0.03	0.37
503.2	0.1	Hekla	6200	10	63.61	0.74	15.15	8.57	0.24	0.9	4.15	4.03	1.78	0.29	99.44
				SD	1.16	0.1	0.3	0.67	0.03	0.16	0.22	0.93	0.14	0.06	0.83
		Kverkfjöll		8	49.67	2.9	13.09	14.11	0.23	5.17	9.88	2.65	0.44	0.35	98.48
				SD	0.46	0.47	0.5	0.92	0.03	0.79	1.12	0.21	0.12	0.11	0.77
		Askja?		2	49.86	1.75	13.97	11.81	0.18	6.71	11.88	2.27	0.21	0.17	98.79
				SD	0.21	0.05	0.33	0.01	0.01	0.3	0.11	0.11	0.02	0.03	0.29
821	31	G10ka Series	10400-9900	353	49.51	2.82	13.3	14.05	0.23	5.68	10.1	2.67	0.42	0.31	99.09
				SD	0.39	0.15	0.21	0.42	0.02	0.25	0.28	0.14	0.04	0.04	0.53
				2	50.66	1.82	13.8	12.92	0.25	6.25	10.94	2.54	0.32	0.18	99.66
				SD	0.36	0.09	0.22	0.88	0.04	0.49	0.91	0.13	0.07	0.01	0.14
				1	48.99	2.65	13.01	15.78	0.24	4.93	10.2	2.74	0.34	0.22	99.09
				4	46.93	4.63	12.9	15.21	0.24	5.02	10.12	3.13	0.71	0.58	99.45
				SD	0.51	0.64	0.54	0.79	0.06	0.41	0.59	0.1	0.12	0.09	0.34
				3	49.37	3.3	12.85	15.24	0.24	4.93	9.43	2.74	0.63	0.38	99.1
				SD	0.64	0.08	0.21	0.25	0.01	0.47	0.67	0.16	0.14	0.07	1.19
885	2.85	Askja S	10830	45	74.89	0.3	12.35	2.77	0.09	0.25	1.58	4.35	2.56	0.04	99.17
				SD	1.18	0.03	0.21	0.12	0.03	0.02	0.08	0.49	0.11	0.04	1.48
				34	50.02	1.82	13.73	12.83	0.22	6.48	11.36	2.46	0.28	0.17	99.38
				SD	0.34	0.13	0.2	0.46	0.03	0.28	0.28	0.12	0.1	0.03	0.58
				6	48.88	2.18	13.5	13.17	0.22	6.67	11.44	2.48	0.26	0.19	98.98
				SD	0.13	0.03	0.07	0.22	0.04	0.05	0.06	0.07	0.01	0.03	0.27
