# Supplementary material for: Delayed postglacial colonization of Betula in Iceland and the circum North Atlantic
Source: eLife. 2023 Nov 13;12:RP87749. doi: 10.7554/eLife.87749 (PMC10642962; doi:10.7554/eLife.87749)
Supplement: Figure 4—source data 1. [file elife-87749-fig4-data1.xlsx]

## Sheet: replicates
Sample ID			arctborbryo_SCS.163.38.1.S41	arctborbryo_SCS.164.38.1.S42	arctborbryo_SCS.165.38.1.S43	arctborbryo_SCS.166.38.1.S44	arctborbryo_SCS.167.38.1.S45	arctborbryo_R4.trnl.1.35.1.S4	arctborbryo_SCS.168.38.1.S46	arctborbryo_SCS.169.38.1.S47	arctborbryo_SCS.170.38.1.S48	arctborbryo_SCS.171.38.1.S151	arctborbryo_SCS.172.38.1.S152	arctborbryo_SCS.173.38.1.S153	arctborbryo_SCS.174.38.1.S73	arctborbryo_SCS.175.38.1.S74	arctborbryo_SCS.208.40.1.S232	arctborbryo_SCS.209.40.1.S233	arctborbryo_SCS.210.38.1.S234	arctborbryo_SCS.211.38.1.S235	arctborbryo_SCS.212.38.1.S236	arctborbryo_trnL.SCS.304.40.5.S392	arctborbryo_SCS.213.38.1.S237	arctborbryo_trnL.SCS.305.40.5.S393	arctborbryo_SCS.214.40.1.S238	arctborbryo_trnL.SCS.306.40.5.S394	arctborbryo_SCS.215.40.1.S239	arctborbryo_trnL.SCS.307.40.5.S395	arctborbryo_SCS.216.40.1.S272	arctborbryo_trnL.SCS.308.40.5.S396	arctborbryo_SCS.217.40.1.S273	arctborbryo_trnL.SCS.309.40.5.S397	arctborbryo_SCS.218.40.1.S274	arctborbryo_trnL.SCS.312.40.5.S432	arctborbryo_SCS.219.40.1.S275	arctborbryo_trnL.SCS.313.40.5.S433	arctborbryo_trnL.SCS.310.40.5.S398	arctborbryo_trnL.SCS.311.40.5.S399	arctborbryo_SCS.220.40.1.S276	arctborbryo_trnL.SCS.314.40.5.S434	arctborbryo_trnL.SCS.315.40.5.S435	arctborbryo_trnL.SCS.316.40.5.S436	arctborbryo_SCS.221.40.1.S277	arctborbryo_trnL.SCS.317.40.5.S437	arctborbryo_trnL.SCS.318.40.5.S438	arctborbryo_SCS.176.38.1.S75	arctborbryo_SCS.177.38.1.S76	arctborbryo_SCS.178.38.1.S77	arctborbryo_SCS.179.38.1.S78
Depth (cm)			2	17	33	45	61	77	85	93	101	117	125	140	148.5	164.5	172.5	180.5	188.5	196.5	204.5	230.5	239.5	252.5	284.5	306	322	346	362	385.5	401.5	425.5	439.5	447	471	479	487	503	511	526.5	542.5	566.5	593.5	609.5	625.5	633.5	645.5	657.5	673.5
Age (year BP)																												4217	4430	4744	4964	5272	5436	5529	5816	5909	6066	6191	6287	6461	6650	6940	7261	7454	7645	7741	7886	8031	8223
Family	Genus	Species
Potamogetonaceae	NA		4			4	5	2	2	5		5	5	5	5	5	5	5	5	5	5	4	5	5	3	5	5		2		2													2
Cyperaceae	Carex		5	4	2	2	2	5	4	2	5	4		4	5	4	4	2	5		3		4	4		3	2									2
Cyperaceae	Eleocharis																																										4					2
Cyperaceae	Eleocharis	Eleocharis uniglumis		4		4									2																																5
Cyperaceae	NA			4					3						3				2				2
Juncaceae	Juncus			2	4									2
Juncaceae	Luzula			3					4			2											4								3
Juncaceae	Oreojuncus	Oreojuncus trifidus	5	4	3	2		5	5			4	5	3	5	3	5	5	3	5	2	3	2	2		2	2		3																			2	4
Poaceae	NA																									2							5					2
Apiaceae	NA			5	5	3	5	3	5	5	5	5	5	5	5	5	5	5	5	5	5	4	4	5	5	5	5	4	2		2	2	2	2							4		4			2		4	2
Asteraceae	NA
Brassicaceae	NA																																															2
Caryophyllaceae	Sagina										5
Caryophyllaceae	Silene		2
Caryophyllaceae	Silene	Silene acaulis		2	2																																										2
Polygonaceae	Bistorta		2	5	5	5	5	3	5	5	5	5	5	5	5	5	5	5	5	5	5	4	5		5	5	5						2													2	2	3
Polygonaceae	Bistorta	Bistorta vivipara																				2			5
Polygonaceae	Koenigia	Koenigia islandica																																		2
Polygonaceae	NA				4			2	3													2
Polygonaceae	Oxyria	Oxyria digyna
Polygonaceae	Rumex			5	4	3	2	5	4		4	2	3	2	5		3	2	5	5	3	2		4	3	2	2		2																		2
Cornaceae	Cornus																																													3	3
Cornaceae	Cornus	Cornus suecica
Cupressaceae	Juniperus																																														4
Ericaceae	Cassiope	Cassiope tetragona			2		3	4									5	2					5
Ericaceae	Kalmia	Kalmia procumbens		2							2				3	2	3	3	2						3		2
Ericaceae	Empetrum																	2					2		2	4	2												3						2
Ericaceae	NA		5	5	5	5	5	5	5	5	5	5	5	5	5	5	5	5	5	5	5	4	5	5	5	5	5	4	5	5	2	4	4	5			2	4	5	3	3	4		3	3	2	5		3
Ericaceae	Phyllodoce	Phyllodoce caerulea			3												4	2					5
Ericaceae	Pyrola										3										5				3
Ericaceae	Vaccinium			5	5	5	5	5	5	5	5	5	5	4	4	5	5	5	5	5	5	4	5	5	4	5	5	3					2					3										3	5
Betulaceae	NA			2		2	4	5	4	5	5	5	5	5	5	4	5	4	5	5	5	3	4	5	5	5	5	2	2	2		3	4	3						3			2
Rubiaceae	Galium			2	2		2	5	5	5	2			2	3	3	5	5	5	4	5	2	4	2	3		4						2										3			4
Geraniaceae	Geranium																5													2
Orobanchaceae	NA			4	3			3		3	5		4	2	4	3	4	5	5	5	3	2	4	4		5	3
Plantaginaceae	Callitriche																																		2
Plantaginaceae	Callitriche	Callitriche hermaphroditica																																	2
Plantaginaceae	Plantago					2	2							2	2
Plantaginaceae	Veronica			3													2						2
Salicaceae	NA		5	5	5	5	5	5	5	5	5	5	5	5	5	5	5	5	5	5	5	5	5		5	5	5	3	5	4	3	3	3	4	3	3	4	3	3	3	4	2	3	2	3	5	3	5	4
Onagraceae	Chamaenerion														2
Onagraceae	NA		3	2	3				4
Ranunculaceae	Caltha					2			3						5		4	3		5	2	4	5	5	5	5	5	5	5	5	5			3		3		4		2				3	4			2	3
Ranunculaceae	NA			4	4	5	5	5	5	5	5	5	5	5	5	5	5	5	5	5	5	2	5	2	5		5	3	5	2	5	3							2						2	5		2	3
Ranunculaceae	Ranunculus		5	3	4	5	5	5	5	5	5	5	5	5	5	5	5	5	5	5	5	4	5	5	5	5	5	4	5	5	5		2	2			3		4	2	2					4
Cannabaceae	Humulus	Humulus lupulus			2
Rosaceae	Alchemilla		2											2
Rosaceae	NA		5	4	4	5	3	5	5	4	5	5	5	5	5	5	5	5	5	5	5	2	4	4	5	5	3	2									5	3									4
Crassulaceae	NA																2		2	2
Haloragaceae	Myriophyllum		5	3	5	3	5	5	5	5	5	5	5	5	5	5	5	5	5	5	5	4	5	5	5	5	5	3	4	3	5	5	5	3	3	3	4				2	4		2
Haloragaceae	Myriophyllum	Myriophyllum alterniflorum																					2
Saxifragaceae	Saxifraga			4			2		5	4				2	2				2	3	2
Dryopteridaceae																							2
CT			28.6	31.7	31.5	30.3	30.6	28.91	29.1	30.7	28.8	26.8	27	27.9	28.6	31.7	30.7	30	29.5	29.3	30.4	28.2	28.4	31.6	35.3	33.4	34.9	34	32.6	33.3	33.1	34.2	32.9	33.9	35.9	35.8	34.1	35	33.8	34.7	35.9	37	37.2	35.9	36.7	31.5	30.3	30.6	29.1
MTQ			0.96	0.8	0.88	0.94	0.84	0.98	0.96	0.92	1	0.88	1	0.96	1	0.98	0.98	1	1	1	1	0.82	0.98	1	0.94	1	0.96	0.58	0.6	0.56	0.54	0.48	0.54	0.46	0.3	0.34	0.4	0.4	0.36	0.32	0.36	0.32	0.32	0.44	0.4	0.46	0.52	0.36	0.58
MAQ			0.88	0.92	0.92	0.92	0.98	1	1	1	1	1	1	1	1	1	1	1	1	1	1	0.8	1	0.96	1	1	1	0.66	0.76	0.56	0.66	0.4	0.62	0.44	0.22	0.28	0.38	0.4	0.36	0.26	0.32	0.22	0.32	0.26	0.3	0.54	0.62	0.52	0.5
[truncated: 28 more columns]

## Sheet: reads
Sample ID			arctborbryo_SCS.163.38.1.S41	arctborbryo_SCS.164.38.1.S42	arctborbryo_SCS.165.38.1.S43	arctborbryo_SCS.166.38.1.S44	arctborbryo_SCS.167.38.1.S45	arctborbryo_R4.trnl.1.35.1.S4	arctborbryo_SCS.168.38.1.S46	arctborbryo_SCS.169.38.1.S47	arctborbryo_SCS.170.38.1.S48	arctborbryo_SCS.171.38.1.S151	arctborbryo_SCS.172.38.1.S152	arctborbryo_SCS.173.38.1.S153	arctborbryo_SCS.174.38.1.S73	arctborbryo_SCS.175.38.1.S74	arctborbryo_SCS.208.40.1.S232	arctborbryo_SCS.209.40.1.S233	arctborbryo_SCS.210.38.1.S234	arctborbryo_SCS.211.38.1.S235	arctborbryo_SCS.212.38.1.S236	arctborbryo_trnL.SCS.304.40.5.S392	arctborbryo_SCS.213.38.1.S237	arctborbryo_trnL.SCS.305.40.5.S393	arctborbryo_SCS.214.40.1.S238	arctborbryo_trnL.SCS.306.40.5.S394	arctborbryo_SCS.215.40.1.S239	arctborbryo_trnL.SCS.307.40.5.S395	arctborbryo_SCS.216.40.1.S272	arctborbryo_trnL.SCS.308.40.5.S396	arctborbryo_SCS.217.40.1.S273	arctborbryo_trnL.SCS.309.40.5.S397	arctborbryo_SCS.218.40.1.S274	arctborbryo_trnL.SCS.312.40.5.S432	arctborbryo_SCS.219.40.1.S275	arctborbryo_trnL.SCS.313.40.5.S433	arctborbryo_trnL.SCS.310.40.5.S398	arctborbryo_trnL.SCS.311.40.5.S399	arctborbryo_SCS.220.40.1.S276	arctborbryo_trnL.SCS.314.40.5.S434	arctborbryo_trnL.SCS.315.40.5.S435	arctborbryo_trnL.SCS.316.40.5.S436	arctborbryo_SCS.221.40.1.S277	arctborbryo_trnL.SCS.317.40.5.S437	arctborbryo_trnL.SCS.318.40.5.S438	arctborbryo_SCS.176.38.1.S75	arctborbryo_SCS.177.38.1.S76	arctborbryo_SCS.178.38.1.S77	arctborbryo_SCS.179.38.1.S78
Depth (cm)			2	17	33	45	61	77	85	93	101	117	125	140	148.5	164.5	172.5	180.5	188.5	196.5	204.5	230.5	239.5	252.5	284.5	306	322	346	362	385.5	401.5	425.5	439.5	447	471	479	487	503	511	526.5	542.5	566.5	593.5	609.5	625.5	633.5	645.5	657.5	673.5
Age (year BP)																												4217	4430	4744	4964	5272	5436	5529	5816	5909	6066	6191	6287	6461	6650	6940	7261	7454	7645	7741	7886	8031	8223
Family	Genus	Species
Potamogetonaceae	NA		438	0	0	965	3346	124	1026	18885	0	1098	4262	5130	131855	2778	15024	2369	23237	6588	8025	2426	2719	2064	4941	3975	5621	0	9129	0	7298	0	0	0	0	0	0	0	0	0	0	0	0	15269	0	0	0	0	0
Cyperaceae	Carex		844	1352	328	809	1202	588	1024	1145	645	467	0	971	7878	103	1066	543	454	0	385	0	547	0	133	145	407	0	0	0	0	0	0	0	0	65579	0	0	0	0	0	0	0	0	0	0	0	0	0
Cyperaceae	Eleocharis		0	0	0	0	0	0	0	0	0	0	0	0	0	0	0	0	0	0	0	0	0	0	0	0	0	0	0	0	0	0	0	0	0	0	0	0	0	0	0	0	240	0	0	0	0	130	0
Cyperaceae	Eleocharis	Eleocharis uniglumis	0	1310	0	955	0	0	0	0	0	0	0	0	153	0	0	0	0	0	0	0	0	0	0	0	0	0	0	0	0	0	0	0	0	0	0	0	0	0	0	0	0	0	0	0	94279	0	0
Cyperaceae	NA		0	1311	0	0	0	0	1332	0	0	0	0	0	640	0	0	0	145	0	0	0	298	0	0	0	0	0	0	0	0	0	0	0	0	0	0	0	0	0	0	0	0	0	0	0	0	0	0
Juncaceae	Juncus		0	640	1422	0	0	0	0	0	0	0	0	357	0	0	0	0	0	0	0	0	0	0	0	0	0	0	0	0	0	0	0	0	0	0	0	0	0	0	0	0	0	0	0	0	0	0	0
Juncaceae	Luzula		0	607	0	0	0	0	1653	0	0	232	0	0	0	0	0	0	0	0	0	0	1436	0	0	0	0	0	0	0	6425	0	0	0	0	0	0	0	0	0	0	0	0	0	0	0	0	0	0
Juncaceae	Oreojuncus	Oreojuncus trifidus	2787	3041	1635	722	0	3200	16243	0	0	675	1485	519	5494	112	1792	1288	616	1552	286	0	741	0	162	348	294	0	17118	0	0	0	0	0	0	0	0	0	0	0	0	0	0	0	0	0	0	7237	60686
Poaceae	NA		0	0	0	0	0	0	0	0	0	0	0	0	0	0	0	0	0	0	0	311	0	0	0	642	0	0	0	0	0	0	77865	0	0	0	0	0	0	0	0	0	0	0	0	0	0	0	0
Apiaceae	NA		0	3339	8407	597	8341	688	3120	4339	32339	3068	4537	27152	9131	1913	11815	12406	6144	27127	4672	0	5283	14945	6800	4278	27885	15782	6244	0	10852	8405	1860	5248	0	0	0	10872	0	0	64530	0	53054	0	0	17474	0	54301	1424
Asteraceae	NA		0	0	0	0	0	0	0	0	0	0	0	0	0	0	0	0	0	0	0	6212	0	0	0	0	0	0	0	0	0	0	0	0	0	0	0	0	0	0	0	0	0	0	0	0	0	0	0
Brassicaceae	NA		0	0	0	0	0	0	0	0	0	0	0	0	0	0	0	0	0	0	0	0	0	0	0	0	0	0	0	0	0	0	0	0	0	0	0	0	0	0	0	0	0	0	0	0	0	73187	0
Caryophyllaceae	Sagina		0	0	0	0	0	0	0	0	1618	0	0	0	0	0	0	0	0	0	0	0	0	0	0	0	0	0	0	0	0	0	0	0	0	0	0	0	0	0	0	0	0	0	0	0	0	0	0
Caryophyllaceae	Silene		549	0	0	0	0	0	0	0	0	0	0	0	0	0	0	0	0	0	0	0	0	0	0	0	0	0	0	0	0	0	0	0	0	0	0	0	0	0	0	0	0	0	0	0	0	0	0
Caryophyllaceae	Silene	Silene acaulis	0	597	427	0	0	0	0	0	0	0	0	0	0	0	0	0	0	0	0	0	0	0	0	0	0	0	0	0	0	0	0	0	0	0	0	0	0	0	0	0	0	0	0	0	7242	0	0
Polygonaceae	Bistorta		5679	45311	12748	10034	17292	3694	7962	1567	2466	5874	13189	12572	25039	2980	10982	7271	9394	9073	7916	0	6333	9983	3277	3144	16144	0	0	0	0	0	5780	0	0	19769	0	0	0	0	0	0	0	0	0	15651	6907	45696	0
Polygonaceae	Bistorta	Bistorta vivipara	0	0	0	0	0	0	0	0	0	0	0	0	0	0	0	0	0	0	0	2276	0	0	0	0	0	0	0	0	0	0	0	0	0	0	0	0	0	0	0	0	0	0	0	0	0	0	0
Polygonaceae	Koenigia	Koenigia islandica	0	0	0	0	0	0	0	0	0	0	0	0	0	0	0	0	0	0	0	0	0	0	0	0	0	0	0	0	0	0	0	0	0	0	0	0	0	0	0	0	0	0	0	0	0	0	0
Polygonaceae	NA		0	0	167	0	0	495	323	0	0	0	0	0	0	0	0	0	0	0	0	109	0	0	0	0	0	0	0	0	0	0	0	0	0	0	0	0	0	0	0	0	0	0	0	0	0	0	0
Polygonaceae	Oxyria	Oxyria digyna	0	0	0	0	0	0	0	0	0	0	0	0	0	0	0	0	0	0	0	0	0	0	0	0	0	0	0	0	0	0	0	0	0	0	0	0	0	0	0	0	0	0	0	0	0	0	0
Polygonaceae	Rumex		0	2463	4417	2057	1182	3573	4912	0	119	243	653	390	1679	0	1481	967	2974	4574	689	212	0	1277	950	1192	381	0	7676	0	0	0	0	0	0	0	0	0	0	0	0	0	0	0	0	0	6037	0	0
Cornaceae	Cornus		0	0	0	0	0	0	0	0	0	0	0	0	0	0	0	0	0	0	0	0	0	0	0	0	0	0	0	0	0	0	0	0	0	0	0	0	0	0	0	0	0	0	0	31859	16302	0	0
Cornaceae	Cornus	Cornus suecica	0	0	0	0	0	0	0	0	0	0	0	0	0	0	0	0	0	0	0	0	0	0	0	0	0	0	0	0	0	0	0	0	0	0	0	0	0	0	0	0	0	0	0	0	0	0	0
Cupressaceae	Juniperus		0	0	0	0	0	0	0	0	0	0	0	0	0	0	0	0	0	0	0	207	0	0	0	0	0	0	0	0	0	0	0	0	0	0	0	0	0	0	0	0	0	0	0	0	23102	0	0
Ericaceae	Cassiope	Cassiope tetragona	0	0	242	0	169	212	0	0	0	0	0	0	0	0	678	100	0	0	0	0	858	0	0	0	0	0	0	0	0	0	0	0	0	0	0	0	11117	0	0	0	0	0	0	0	0	0	0
Ericaceae	Kalmia	Kalmia procumbens	0	626	0	0	0	0	0	0	178	0	0	0	1808	116	566	455	555	0	0	0	0	1461	0	0	1644	0	0	0	0	0	0	0	0	0	0	0	242760	0	0	0	0	0	0	0	0	0	0
Ericaceae	Empetrum		0	0	0	0	0	0	0	0	0	0	0	0	0	0	0	318	0	0	0	0	303	747	0	681	556	0	0	0	0	0	0	0	0	0	0	0	0	0	0	0	0	0	3801	0	0	0	0
Ericaceae	NA		8345	39920	28677	15771	18085	22908	31279	10391	12208	6310	23981	16468	26024	6142	34592	14654	11198	23949	32825	0	42802	29800	12131	16794	33952	19453	20991	85497	25468	29816	10445	94703	0	0	7328	37777	0	68811	39633	43634	0	37780	41039	10797	35151	0	12900
Ericaceae	Phyllodoce	Phyllodoce caerulea	0	0	708	0	0	0	0	0	0	0	0	0	0	0	1294	406	0	0	0	0	3180	0	0	0	0	0	0	0	0	0	0	0	0	0	0	0	0	0	0	0	0	0	0	0	0	0	0
Ericaceae	Pyrola		0	0	0	0	0	0	0	0	471	0	0	0	0	0	0	0	0	0	1836	44678	0	467	0	0	0	0	0	0	0	0	0	0	0	0	0	0	0	0	0	0	0	0	0	0	0	0	0
Ericaceae	Vaccinium		0	2983	10026	29122	6393	8528	6950	4274	1785	8261	21076	4522	3006	1583	8185	10011	4251	6722	5795	0	12605	5532	3115	3976	6520	4137	0	0	0	0	8593	0	0	0	0	27493	0	0	0	0	0	0	0	0	0	6005	47346
Betulaceae	NA		0	389	0	985	1463	2767	2125	1124	505	1033	1859	11200	3956	529	6886	1214	2580	2184	1906	2477	1686	11528	1348	6871	7396	910	10609	1626	0	13530	19640	16007	0	0	0	0	0	30446	0	0	56329	0	0	0	0	0	0
Rubiaceae	Galium		0	2365	1627	0	1618	1040	6129	792	491	0	0	653	730	119	5222	1156	73644	1918	1325	120	3060	1409	207	0	2847	0	0	0	0	0	7109	0	0	0	0	0	0	0	0	0	45335	0	0	41211	0	0	0
Geraniaceae	Geranium		0	0	0	0	0	0	0	0	0	0	0	0	0	0	431	0	0	0	0	121	0	0	0	0	0	0	0	663	0	0	0	0	0	0	0	0	0	0	0	0	0	0	0	0	0	0	0
Orobanchaceae	NA		0	2315	1251	0	0	1490	0	2067	1449	0	860	2219	727	213	1114	1973	1323	5052	944	0	1493	0	710	2345	837	0	0	0	0	0	0	0	0	0	0	0	0	0	0	0	0	0	0	0	0	0	0
Plantaginaceae	Callitriche		0	0	0	0	0	0	0	0	0	0	0	0	0	0	0	0	0	0	0	195	0	0	0	0	0	0	0	0	0	0	0	0	132	0	0	0	0	0	0	0	0	0	0	0	0	0	0
Plantaginaceae	Callitriche	Callitriche hermaphroditica	0	0	0	0	0	0	0	0	0	0	0	0	0	0	0	0	0	0	0	0	0	0	0	0	0	0	0	0	0	0	0	0	32934	0	0	0	0	0	0	0	0	0	0	0	0	0	0
Plantaginaceae	Plantago		0	0	0	1013	781	0	0	0	0	0	0	480	202	0	0	0	0	0	0	0	0	0	0	0	0	0	0	0	0	0	0	0	0	0	0	0	29839	0	0	0	0	0	0	0	0	0	0
Plantaginaceae	Veronica		0	2099	0	0	0	0	0	0	0	0	0	0	0	0	439	0	0	0	0	0	335	0	0	0	0	0	0	0	0	0	0	0	0	0	0	0	0	0	0	0	0	0	0	0	0	0	0
Salicaceae	NA		62961	248036	201094	146235	136541	320057	190122	58727	38998	63206	46835	106590	65249	174836	98689	61743	48163	88792	59923	50638	98287	59008	19077	39457	128162	12128	67882	21178	11233	10034	11705	45109	69401	57642	31031	14903		29652	49664	26106	19857	2307	53795	57498	19487	105459	32973
Onagraceae	Chamaenerion		0	0	0	0	0	0	0	0	0	0	0	0	241	0	0	0	0	0	0	0	0	0	0	0	0	0	0	0	0	0	0	0	0	0	0	0	0	0	0	0	0	0	0	0	0	0	0
Onagraceae	NA		401	799	1733	0	0	0	3763	0	0	0	0	0	0	0	0	0	0	0	0	0	0	0	0	0	0	0	0	0	0	0	0	0	0	0	0	0	3241	0	0	0	0	0	0	0	0	0	0
Ranunculaceae	Caltha		0	0	0	435	0	0	151	0	0	0	0	0	1532	0	153	117	0	213	113	0	259	778	8871	11363	459	43009	4161	27484	771	13639	0	26256	0	18871	0	7123	47664	12883	0	0	0	33543	57980	0	0	10722	110
Ranunculaceae	NA		0	2561	9627	3669	5661	19972	14370	5346	4884	1972	5367	6637	57245	1922	11874	9429	7990	12243	6152	9545	4765	39510	174	0	18751	2138	85748	2848	24322	0	0	0	0	0	0	0	0	0	0	0	0	0	121	9543	0	10634	22252
Ranunculaceae	Ranunculus		2540	2359	3728	11759	11007	3086	15416	6138	3909	7981	12323	7844	17131	3143	20638	24183	6481	13682	11215	152	6202	32702	8421	18837	21403	19552	30980	12866	73014	0	8525	11628	0	0	13970	0	0	17077	5401	0	0	0	0	38135	0	0	0
Cannabaceae	Humulus	Humulus lupulus	0	0	1882	0	0	0	0	0	0	0	0	0	0	0	0	0	0	0	0	0	0	0	0	0	0	0	0	0	0	0	0	0	0	0	0	0	0	0	0	0	0	0	0	0	0	0	0
Rosaceae	Alchemilla		477	0	0	0	0	0	0	0	0	0	0	432	0	0	0	0	0	0	0	5243	0	0	0	0	0	0	0	0	0	0	0	0	0	0	0	0	0	0	0	0	0	0	0	0	0	0	0
Rosaceae	NA		1675	2419	3601	4250	4877	2677	3411	1382	1159	1953	1470	2894	2980	940	4522	14409	3163	16271	4672	0	1063	3273	1567	3142	1518	9114	0	0	0	0	0	0	0	0	54230	22462	0	0	0	0	0	0	0	0	27174	0	0
Crassulaceae	NA		0	0	0	0	0	0	0	0	0	0	0	0	0	0	651	0	173	289	0	616	0	0	0	0	0	0	0	7863	0	0	0	0	0	0	0	0	0	0	0	0	0	0	0	0	0	0	0
Haloragaceae	Myriophyllum		85706	926	6013	998	22937	11666	15847	48913	2876	51198	24636	14693	81157	32561	58707	43384	39572	16327	70328	0	97564	18554	65135	17414	15022	12877	32213	0	35059	77425	60773	25254	66363	58504	56321	0	0	0	18936	119083	0	31625	0	0	0	0	0
Haloragaceae	Myriophyllum	Myriophyllum alterniflorum	0	0	0	0	0	0	0	0	0	0	0	0	0	0	0	0	0	0	0	15365	156	0	0	0	0	0	0	0	0	0	0	0	0	0	0	0	0	0	0	0	0	0	0	0	0	0	0
Saxifragaceae	Saxifraga		0	3328	0	0	1404	0	2611	1255	0	0	0	1693	805	0	0	0	432	585	289	0	0	0	0	0	0	0	0	0	0	0	0	0	0	0	0	0	0	0	0	0	0	0	0	0	0	0	0
Dryopteridaceae			0	0	0	0	0	0	0	0	0	0	0	0	0	0	0	0	0	0	0	0	139	0	0	0	0	0	0	0	0	0	0	0	0	0	0	0	0	0	0	0	0	0	0	0	0	0	0
TOTAL ASSIGNED READS			172402	371096	299760	230376	242299	406765	329769	166345	106100	153571	162533	223416	444662	229990	296801	208396	242489	237141	219296	140903	292253	233038	137019	134604	289799	139100	292751	160025	194442	152849	212295	224205	168830	220365	162880	120630	334621	158869	178164	188823	174815	120524	156736	222168	252984	313371	177691
TOTAL RAW READS			175230	393680	308539	236211	246910	417610	350115	172620	108399	157398	166759	238858	455662	234859	305284	220925	266822	245510	229223	146029	302102	145175	251234	139808	303039	152852	312991	161923	282304	168223	231128	254129	259284	230966	191881	156291	350094	241132	255213	246547	324569	265482	300538	274751	293042	348253	355010
[truncated: 28 more columns]
